# Supplementary material for: JAK selectivity and the implications for clinical inhibition of pharmacodynamic cytokine signalling by filgotinib, upadacitinib, tofacitinib and baricitinib
Source: HighWire-hosted journal article supplement (doi:10.1136/annrheumdis-2020-219012), 2021-03-19
Supplement: annrheumdis-2020-219012supp001_data_supplement.pdf [file annrheumdis-2020-219012supp001_data_supplement.pdf]

Supplemental Materials to:

Traves PG, Murray B, Campigotto F, et al.  
JAK Selectivity and the Implications for Clinical Inhibition of Pharmacodynamic Cytokine Signaling by Filgotinib, Upadacitinib, Tofacitinib, and Baricitinib

Contents

Detailed Methods..... 2

Appendix 1: Characteristics of RA Donors ..... 6

Appendix 2: Reagents and Compounds ..... 7

Appendix 3: Gating Strategies .....10

Appendix 4: Raw Flow Cytometry Data .....13

Supplemental Table 1. Clinical Efficacy and Safety Findings From Phase 3 Studies of JAKinibs .....14

Supplemental Table 2. JAKinib IC<sub>50</sub> Values in CD4+ T Cells, Monocytes, and NK Cells From PBMC Assays .....16

Supplemental Table 3. JAKinib IC<sub>50</sub> Values in B Cells, and CD8+ T Cells From PBMC Assays .....17

Supplemental Table 4. JAKinib Potency Differences Based on Cell Type .....18

Supplemental Table 5. JAKinib Potency Differences Based on the STAT Substrate .....20

Supplemental Table 6. JAKinib Potencies Impacted by Stimuli Utilizing the Same JAK Pair .....21

Supplemental Table 7. Heatmap of Time Above 50% Inhibition at Clinical Doses of JAKinibs .....22

Supplemental Figure 1. ....23

Supplemental Figure 2. ....24

Supplemental Figure 3. ....26

Supplemental Figure 4. ....27

Supplemental Figure 5. ....28

Supplemental Figure 6. ....29

Supplemental Figure 7. ....30

Supplemental Figure 8. .... 31

Supplemental Figure 9. ....32

## Detailed Methods

### *PBMC and WB Preparation and Experimental Design*

**Figure 2** illustrates the experimental and data analysis procedures. Whole blood samples from healthy donors (N=10) were collected by venipuncture in sodium heparin and processed within 24 hours. PBMCs were harvested from matched whole blood (200mL) by Ficoll gradient. PBMCs or WB were plated into 96-well flat bottom plates and incubated with each JAKinib. Filgotinib (GS-6034) and its active metabolite (MET, GS-829845) were synthesized at Gilead Sciences, Inc. (Foster City, CA). Baricitinib (GS-623452) was purchased from AstaTech, Inc. (Bristol, PA), tofacitinib (GS-493645) was synthesized by Advanced Chemblocks, Inc. (Burlingame, CA), and upadacitinib (GS-942618) was synthesized by MedChemExpress (Monmouth Junction, NJ). Baricitinib, tofacitinib, and upadacitinib were prepared as 10mM stocks and filgotinib and MET as 40mM or 160mM stocks in dimethyl sulfoxide (DMSO). JAKinibs were applied using 8-point dose-titrations ranging from 0.6–10,000nM (baricitinib, tofacitinib, and upadacitinib) or either 2.4–40,000nM or 9.7–160,000nM (filgotinib and MET) (four-fold dilutions) in duplicate, for 60 min prior to cytokine stimulation for 15 min at 37°C.

Whole blood samples from rheumatoid arthritis donors (n=3; patient details are provided in **Appendix 1**) and matched healthy donors (n=2) were collected by venipuncture in sodium heparin, shipped ON at 4C and processed within 36 hours. RA and HD samples were gender and aged matched. RA blood samples were obtained from BioIVT (Hicksville, NY) for experimental use. The inclusion criteria for RA patients included patients able to provide written informed consent, with confirmed diagnosis of RA, with active moderate to severe RA, who have not taken an investigational drug in the last year and who have not been treated with any JAK inhibitor.

### *Cytokine EC<sub>80</sub> Determination*

Cytokine concentrations were optimized in PBMCs and WB (N=3) to achieve 80% maximal pSTAT signals in each cell population. Final concentrations were: PBMCs; GM-CSF (9pg/ml), G-CSF (4ng/mL), IFN-γ (0.2ng/ml), IFN-α (6ng/ml), IL-2 (5ng/ml), IL-4 (0.2ng/ml), IL-6 (4ng/ml), and IL-15 (0.4ng/ml). Blood; GM-CSF (9pg/ml), G-CSF [10-25ng/mL (10ng/ml donors 1 and 2, 25ng/ml donors 4-6)], IFN-γ (8ng/ml), IFN-α (6ng/ml), IL-2 (5ng/ml), IL-4 (0.3ng/ml), IL-6 (10ng/ml), IL-12 (10ng/ml), IL-23 (100ng/ml) and IL-15 (1ng/ml).

### *Flow Cytometry*

Cells were lyse/fixed, permeabilized and frozen at -80°C. STAT phosphorylation (pSTAT1, pSTAT3, pSTAT4, pSTAT5 and pSTAT6) was detected and quantified by multicolor flow cytometry in the phenotypically gated leukocyte subpopulations defined as CD19+ (B cells), CD3+CD4+ (CD4+ T cells), CD3+CD8+ (CD8+ T cells), CD3+CD8+CD45RA- (CD8+ memory T cells), CD3-CD56+ (NK cells), CD15+ (neutrophils), and CD14+ (monocytes) (See **Appendix 2** for reagents and compounds and **Appendix 3** for gating strategies). The mean fluorescent intensity (MFI) for the unstimulated versus stimulated conditions was analyzed and reported when >1.4 and >200 fluorescent units. The raw flow cytometry data are shown in **Appendix 4**.

### *Curve-Fitting Parameters for Concentration Response Curves*

For a given response [cell source (PBMC or WB), stimulation (IL-2, IL-15, IL-4, IL-12, IL-23, IFNα, IFNγ, IL-6, G-CSF, and GM-CSF), cell type (B, CD4+, CD8+, CD8+ memory T cells, NK, monocytes, and neutrophils), and pSTAT (pSTAT1, 3, 4, 5, 6)] the half maximal (IC<sub>50</sub>) values for each JAKinib was determined by inhibition of MFI. A 4-parameter logistic curve fit was reported as % pSTAT inhibition using GraphPad Prism 8.1.2. The IC<sub>50</sub> value from a curve was accepted if the following conditions were met: (1) the R<sup>2</sup> was >0.7, and (2) the standard error

of the slope was <6. The arithmetic mean  $IC_{50}$  value for each case was estimated in PBMCs (N=3-5) and WB (N=6-10) and compared among JAKinibs.

#### *Pharmacokinetic (PK) Profiles*

Human steady-state population PK curves in RA subjects for baricitinib once-daily dosing at 2 or 4mg,[1] TOFA with twice-daily 5 and 10mg,[2], and UPA with once-daily dosing at 15 and 30mg,[3] were used as previously reported. The PK profile of FIL was simulated based on a 2-compartment model, including a first-order absorption with lag time. For the metabolite, the PK was obtained based on a 1-compartment model, including a zero-order input, followed by first-order absorption model.

#### *Estimation and Comparison of Time Above $IC_{50}$ and Daily Percent Inhibition*

The mean  $IC_{50}$  values obtained from duplicate dose-response curves and human population PK curves were used to model time above  $IC_{50}$  and average daily percent inhibition for each cytokine/STAT pair in individual cell types. In vitro  $IC_{50}$  value in PBMCs were adjusted for protein binding by dividing the  $IC_{50}$  value for each donor by the experimentally assessed unbound fraction (N=3). Measured protein binding were: baricitinib 53%, filgotinib 64%, GS-829845 69%, tofacitinib 67%, and upadacitinib 50% (FDA Center for Drug Evaluation and Research NDA 211675). No adjustments were made to whole blood values. The time above  $IC_{50}$  was defined as the total time the PK concentration was above the  $IC_{50}$  values. The average daily percent inhibition was obtained by entering the steady state PK concentrations into the concentration response curves, computing the area under the curve (AUC), and dividing it by 24 hours.

#### *Statistical Analysis*

Comparisons between filgotinib and the other treatment groups were performed using a two-way mixed effect Analysis of Variance (ANOVA) to model the time above  $IC_{50}$  and average daily percent inhibition with fixed effect for compound for each stimulation, cell type, and pSTAT combination and random effect for donor with Dunnett's multiplicity correction for multiple comparison adjustments. Filgotinib 200mg was considered the reference group for the comparisons. The same mixed effect model was used to fit the  $\log(IC_{50})$  values and estimate and compare mean  $IC_{50}$  values. Reported time above  $IC_{50}$ , average daily percent inhibition, and  $IC_{50}$  values corresponded to the least squares means of the compound effects from those models. Comparisons were considered significant at a two-sided alpha level of 0.05. Analyses were performed using GraphPad Prism version 8.1.2 and SAS version 9.4. Analysis between protein-adjusted PBMC values and WB were performed using Pearson's correlation. Sample size (N=10) was based on feasibility and internal pilot data.

#### *Clinical study: Ex Vivo Stimulation of Phase 1 Samples*

The phase 1 study in human volunteers was a randomized, placebo-controlled study: (study identifier: NCT01179581). Subjects received filgotinib 200mg once daily or placebo. Blood was collected from healthy volunteers (N=10) into lithium heparin vacutainer tubes, following their informed consent. Blood was equilibrated at 37°C for 30 min and triggered with either recombinant human IL-6 (10 ng/mL; R&D Systems) or recombinant human GM-CSF (20 pg/mL; PeproTech) at 37°C for 20 min and treated with prewarmed 1X lysis/fix buffer (BD Biosciences) to lyse RBCs and fix leukocytes. Cells were permeabilized with 100% methanol and incubated with anti-pSTAT1 (#612564) and anti-CD4 (#555349) or anti-pSTAT5 (#612567) and anti-CD33 (#345800) antibodies (BD Biosciences) at 4°C for 30 min, washed once with PBS 1X, and analyzed on a FACSanto II flow cytometer. Full details have been published previously.[4]

## References

1. Zhang X, Chua L, Ernest C, 2nd, Macias W, Rooney T, Tham LS. Dose/exposure-response modeling to support dosing recommendation for phase III development of baricitinib in patients with rheumatoid arthritis. *CPT Pharmacometrics Syst Pharmacol* 2017;6(12):804-13.
2. Center for Drug Evaluation and Research (CDER). Application Number: 203214Orig1s000. NDA 203214: Tofacitinib. Available at: [https://www.accessdata.fda.gov/drugsatfda\\_docs/nda/2012/203214Orig1s000ClinPharmR.pdf](https://www.accessdata.fda.gov/drugsatfda_docs/nda/2012/203214Orig1s000ClinPharmR.pdf). Accessed May 19, 2020.
3. Klunder B, Mittapalli RK, Mohamed MF, Friedel A, Noertersheuser P, Othman AA. Population pharmacokinetics of upadacitinib using the immediate-release and extended-release formulations in healthy subjects and subjects with rheumatoid arthritis: Analyses of phase I-III clinical trials. *Clin Pharmacokinet* 2019;58(8):1045-58.
4. Van Rompaey L, Galien R, van der Aar EM, Clement-Lacroix P, Nelles L, Smets B, et al. Preclinical characterization of GLPG0634, a selective inhibitor of JAK1, for the treatment of inflammatory diseases. *J Immunol* 2013;191(7):3568-77.



**Appendix 1: Characteristics of RA Donors**

|                                                            | <b>RA Donor 1</b>                                                       | <b>RA Donor 2</b>                                               | <b>RA Donor 3</b> |
|------------------------------------------------------------|-------------------------------------------------------------------------|-----------------------------------------------------------------|-------------------|
| <b>RA Diagnosis Date</b>                                   | 1996                                                                    | 2014                                                            | 2017              |
| <b>Gender</b>                                              | Female                                                                  | Female                                                          | Female            |
| <b>Age</b>                                                 | 52 years                                                                | 40 years                                                        | 56 years          |
| <b>Ethnicity</b>                                           | Caucasian                                                               | Caucasian                                                       | Caucasian         |
| <b>Other Conditions</b>                                    | Celiac Disease, Lupus, Sjogren's Syndrome, Psoriasis                    | None                                                            | None              |
| <b>Treatment</b>                                           | Hydrocodone                                                             | Gabapentin, Hydroxychloroquine (Plaquenil), Meloxicam, Tramadol | Humira Injection  |
| <b>Disease Severity</b>                                    | Severe                                                                  | Moderate                                                        | Moderate          |
| <b>Receiving Treatment for Other Pathologies?</b>          | Yes; Synthroid, Tizanidine, Prednisone, Doxycycline, Testosterone Cream | No                                                              | No                |
| <b>Pregnant or nursing?</b>                                | No                                                                      | No                                                              | No                |
| <b>Taking an investigational product in the last year?</b> | No                                                                      | No                                                              | No                |

**Appendix 2: Reagents and Compounds****EC<sub>80</sub> Values**

| <b>Whole Blood Cytokine EC80s</b> |               |                    |                                         |
|-----------------------------------|---------------|--------------------|-----------------------------------------|
| <b>Cytokine</b>                   | <b>Vendor</b> | <b>Catalog No.</b> | <b>EC80</b>                             |
| GMCSF                             | Peprotech     | 300-03             | 9pg/ml                                  |
| GCSF*                             | Peprotech     | 300-23             | Donor1-2: 10ng/ml<br>Donor 4-6: 25ng/ml |
| IFN $\gamma$                      | Peprotech     | 300-02             | 8ng/ml                                  |
| IFN $\alpha$                      | Sigma         | H6041              | 6ng/ml                                  |
| IL-2                              | Gibco         | PHC0021            | 5ng/ml                                  |
| IL-4                              | Peprotech     | 200-04             | 0.3ng/ml                                |
| IL-6                              | Peprotech     | 200-06             | 10ng/ml                                 |
| IL-15                             | Peprotech     | 200-15             | 1ng/ml                                  |
| IL-12                             | R&D systems   | 219-IL             | 10ng/ml                                 |
| IL-23                             | Proteintech   | HZ-1254            | 100ng/ml                                |
| <b>PBMC Cytokine EC80s</b>        |               |                    |                                         |
| <b>Cytokine</b>                   | <b>Vendor</b> | <b>Catalog No.</b> | <b>EC80</b>                             |
| GMCSF                             | Peprotech     | 300-03             | 9pg/ml                                  |
| GCSF                              | Peprotech     | 300-23             | 4ng/ml                                  |
| IFN $\gamma$                      | Peprotech     | 300-02             | 0.2ng/ml                                |
| IFN $\alpha$                      | Sigma         | H6041              | 6ng/ml                                  |
| IL-2                              | Gibco         | PHC0021            | 5ng/ml                                  |
| IL-4                              | Peprotech     | 200-04             | 0.2ng/ml                                |
| IL-6                              | Peprotech     | 200-06             | 4ng/ml                                  |
| IL-15                             | Peprotech     | 200-15             | 0.4ng/ml                                |

\*EC<sub>80</sub> value of GCSF on whole blood was increased by 2.5x after the first 2 donors were treated.

**Staining Panels**

| <b>Conjugated STAT Antibodies (Post MeOH Perm) All Donors</b> |                 |               |                 |                    |                        |
|---------------------------------------------------------------|-----------------|---------------|-----------------|--------------------|------------------------|
| <b>Cytokines</b>                                              | <b>Antibody</b> | <b>Vendor</b> | <b>Dilution</b> | <b>Catalog No.</b> | <b>Clone</b>           |
| IFN $\gamma$ , IL-6, IFN $\alpha$                             | STAT1           | CST           | 50              | 8009S              | 58D6/P-STAT1 (Tyr701)  |
| G-CSF, IL-6, IFN $\alpha$ , IL-23                             | STAT3           | BD            | 20              | 562071             | 4/P-STAT3 (pY705)      |
| GM-CSF, IL-2, IFN $\alpha$ , IL-15                            | STAT5           | BD            | 20              | 562076             | 47/P-STAT5 (pY694)     |
| IL-4                                                          | STAT6           | BD            | 20              | 562079             | 18/P-STAT6 (pY641)     |
| IL-12                                                         | STAT4           | Miltenyi      | 20              | 130-114-492        | REA855/P-STAT4 (pY693) |

| Panel 1: Donor 1 WB |          |       |             |        |           |             |
|---------------------|----------|-------|-------------|--------|-----------|-------------|
| Antigen             | Color    | Titer | Catalog No. | Clone  | Vendor    | Pre vs Post |
| CD8                 | UV805    | 50    | 612889      | SK1    | BD        | Pre-Perm    |
| CD4                 | UV737    | 50    | 612748      | SK3    | BD        | Pre-Perm    |
| CD14                | UV395    | 50    | 563561      | MphiP9 | BD        | Pre-Perm    |
| CD19                | BV785    | 50    | 563325      | SJ25C1 | BD        | Pre-Perm    |
| CD56                | BV711    | 100   | 318336      | HCD56  | Biolegend | Pre-Perm    |
| CD16                | BV711    | 100   | 302044      | 3G8    | Biolegend | Pre-Perm    |
| CD3                 | APC Fire | 200   | 300470      | UCHT1  | Biolegend | Post-Perm   |

| Panel 2: Donor 1 PBMC, Donor 2 WB+PBMC |       |       |             |        |           |             |
|----------------------------------------|-------|-------|-------------|--------|-----------|-------------|
| Antigen                                | Color | Titer | Catalog No. | Clone  | Vendor    | Pre vs Post |
| CD8                                    | UV737 | 50    | 612754      | SK1    | BD        | Pre-Perm    |
| CD4                                    | UV805 | 50    | 612887      | SK3    | BD        | Pre-Perm    |
| CD14                                   | UV737 | 25    | 612763      | M5E2   | BD        | Pre-Perm    |
| CD19                                   | BV785 | 50    | 563325      | SJ25C1 | BD        | Pre-Perm    |
| CD56                                   | BV711 | 100   | 318336      | HCD56  | Biolegend | Pre-Perm    |
| CD16                                   | BV711 | 100   | 302044      | 3G8    | Biolegend | Pre-Perm    |
| CD3                                    | PE    | 50    | 300441      | UCHT1  | Biolegend | Post-Perm   |
| CD15                                   | PECY7 | 100   | 323030      | W6D3   | Biolegend | Post-Perm   |

| Panel 3: Donor 4 WB+PBMC |            |       |             |        |           |             |
|--------------------------|------------|-------|-------------|--------|-----------|-------------|
| Antigen                  | Color      | Titer | Catalog No. | Clone  | Vendor    | Pre vs Post |
| CD8                      | UV737      | 50    | 612754      | SK1    | BD        | Pre-Perm    |
| CD4                      | UV805      | 50    | 612887      | SK3    | BD        | Pre-Perm    |
| CD14                     | UV395      | 25    | 563561      | MphiP9 | BD        | Pre-Perm    |
| CD19                     | BV785      | 50    | 563325      | SJ25C1 | BD        | Pre-Perm    |
| CD56                     | BV711      | 100   | 318336      | HCD56  | Biolegend | Pre-Perm    |
| CD16                     | BV711      | 100   | 302044      | 3G8    | Biolegend | Pre-Perm    |
| CD3                      | PE         | 50    | 300441      | UCHT1  | Biolegend | Post-Perm   |
| CD15                     | Percpcy5.5 | 200   | 323030      | W6D3   | Biolegend | Post-Perm   |

| Panel 4: Donor 5 WB+PBMC, Donor 6 WB+PBMC |            |       |             |        |           |             |
|-------------------------------------------|------------|-------|-------------|--------|-----------|-------------|
| Antigen                                   | Color      | Titer | Catalog No. | Clone  | Vendor    | Pre vs Post |
| CD8                                       | AX700      | 100   | 557945      | RPA-T8 | BD        | Pre-Perm    |
| CD4                                       | UV805      | 50    | 612887      | SK3    | BD        | Pre-Perm    |
| CD14                                      | UV737      | 25    | 612763      | M5E2   | BD        | Pre-Perm    |
| CD19                                      | BV785      | 50    | 563325      | SJ25C1 | BD        | Pre-Perm    |
| CD56                                      | BV711      | 100   | 318336      | HCD56  | Biolegend | Pre-Perm    |
| CD16                                      | BV711      | 100   | 302044      | 3G8    | Biolegend | Pre-Perm    |
| CD3                                       | BUV395     | 50    | 563546      | UCHT1  | BD        | Pre-Perm    |
| CD15                                      | Percpcy5.5 | 200   | 323030      | W6D3   | Biolegend | Post-Perm   |

| Panel 5: IL-12 and IL-23 Donors 1-10 WB |        |       |             |        |           |             |
|-----------------------------------------|--------|-------|-------------|--------|-----------|-------------|
| Antigen                                 | Color  | Titer | Catalog No. | Clone  | Vendor    | Pre vs Post |
| CD8                                     | BUV805 | 100   | 612889      | SK1    | BD        | Pre-Perm    |
| CD4                                     | BUV737 | 50    | 612748      | SK3    | BD        | Pre-Perm    |
| CD45RA                                  | PE-Cy7 | 25    | 560675      | HI100  | BD        | Pre-Perm    |
| CD19                                    | BV786  | 50    | 563325      | SJ25C1 | BD        | Pre-Perm    |
| CD56                                    | BV711  | 100   | 318336      | HCD56  | Biolegend | Pre-Perm    |
| CD16                                    | BV711  | 100   | 302044      | 3G8    | Biolegend | Pre-Perm    |
| CD3                                     | PE     | 50    | 552127      | SP34-2 | BD        | Post-Perm   |
| CD15                                    | PE-Cy7 | 200   | 323030      | SSEA-1 | Biolegend | Post-Perm   |

### Appendix 3: Gating Strategies

A) Gating strategy for common whole blood and PBMC cell populations (monocytes, CD4+, CD8+, NK cells, and B cells)

Initial phases of the gating strategy were common for whole blood and PBMCs

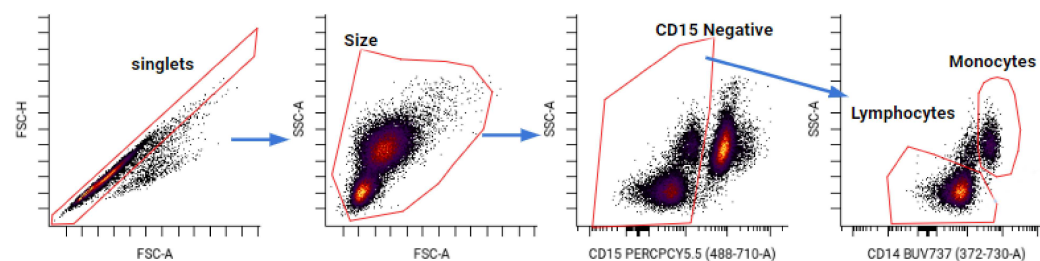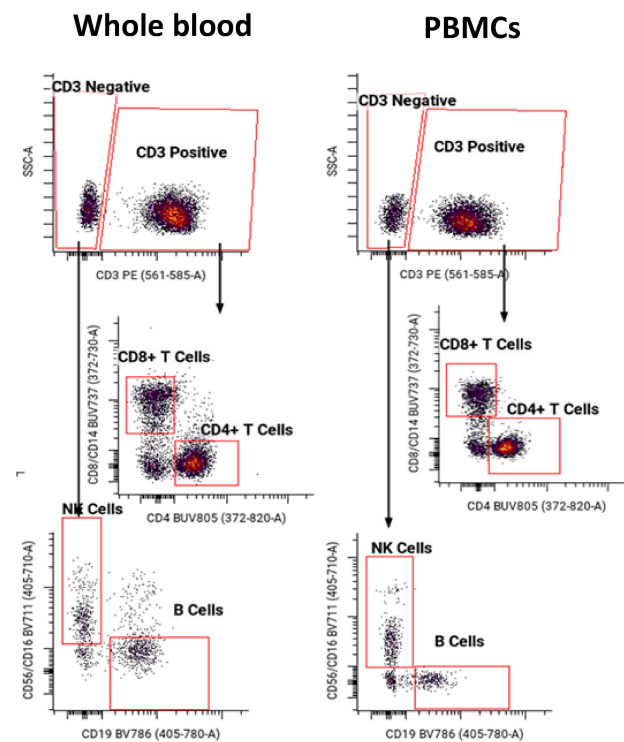

B) Gating strategy for neutrophils (whole blood). There were 3 different gating strategies depending on the antibody cocktail used.

Strategy 1. No CD15 marker included.

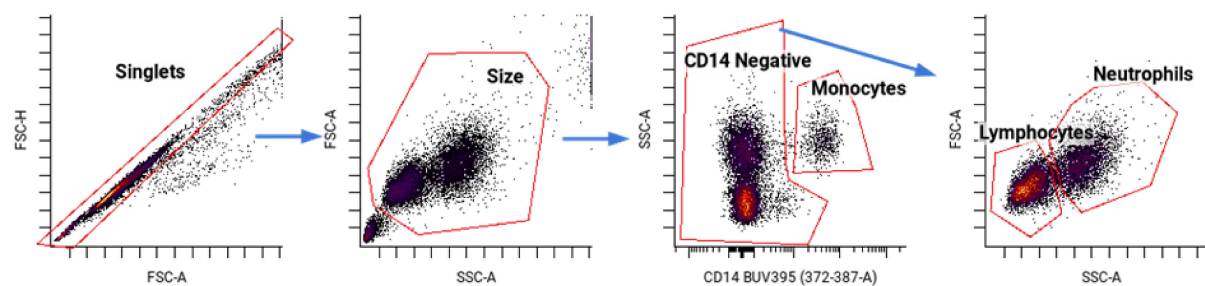

Strategy 2. CD15 PE-Cy7 marker.

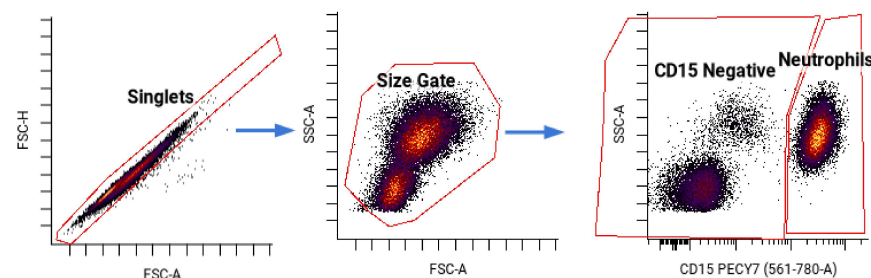

## Strategy 3. CD15 Percp-Cy5.5 marker.

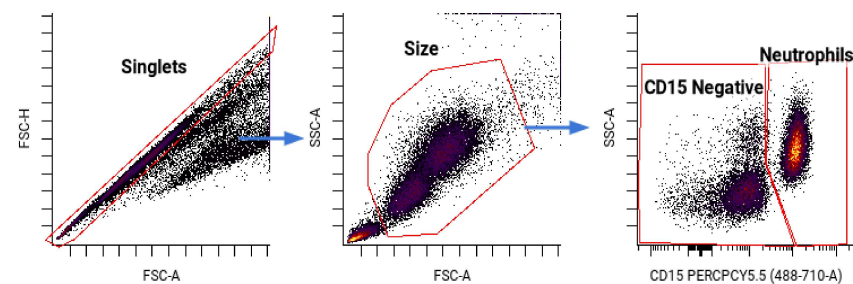

## C) Gating strategy for CD8+ memory T cells (IL-23 stimulation; Whole blood)

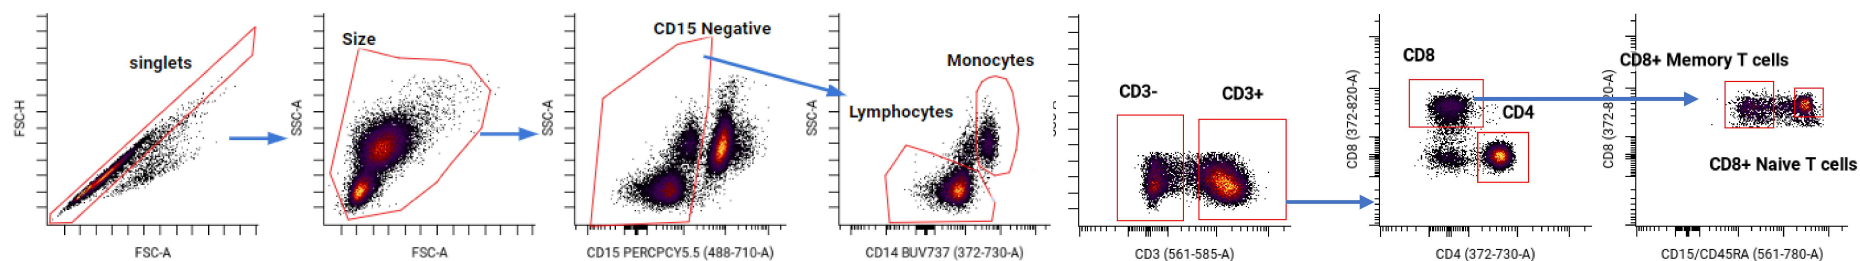

**Appendix 4: Raw Flow Cytometry Data**

Raw flow cytometry data is provided separately as an Excel document. Datasets are described below:

- Dataset 1: Donors 1-5. Whole blood and PBMCs data. Monocytes, B cells, CD4 T cells, CD8 T cells and NK cells Dataset 1-Neutrophils. Donors 1-5. Whole blood. Neutrophils
- Dataset 2: Donors 6-10. Whole blood data. Monocytes, B cells, CD4 T cells, CD8 T cells, NK cells and neutrophils
- Dataset 3: Donors 1-10. Whole blood data. IL-12 and IL-23 stimuli. NK cells and CD8+ memory T cells
- Dataset 4: Whole blood data. RA donors and matching healthy donors



**Supplemental Table 1.** Clinical Efficacy and Safety Findings From Phase 3 Studies of JAKinibs.

|                                                     | Filgotinib                    | Tofacitinib       | Upadacitinib                  | Baricitinib                    |                                 |
|-----------------------------------------------------|-------------------------------|-------------------|-------------------------------|--------------------------------|---------------------------------|
|                                                     | 200 mg                        | 5 mg, bid         | 15 mg                         | 2 mg                           | 4 mg                            |
| MTX-IR<br>ACR20/50/70/DAS28CR <sup>a</sup>          | 19/25/21/32<br>[1]            | 25/26/15/5<br>[2] | 31/33/25/32<br>[3]            | NR                             | 37/32/22/33 <sup>b</sup><br>[4] |
| Biologic-IR<br>ACR20/50/70/<br>DAS28CR <sup>c</sup> | 35/28/15/14<br>[1]            | 17/18/12/4<br>[2] | 37/22/5/20<br>[3]             | 22/12/11/9 <sup>d</sup><br>[4] | 28/20/9/8 <sup>d</sup><br>[4]   |
| Hemoglobin (g/dL)                                   | +0.2<br>[5]                   | +0.08<br>[6]      | -0.8<br>[7]                   | -0.28<br>[8]                   | -0.2<br>[8]                     |
| Herpes zoster (E/100PY)                             | 0.1%<br>(0.3% placebo)<br>[1] | 1-10%<br>[2]      | 0.7%<br>(0.2% placebo)<br>[3] | 1.4%<br>(0.4% placebo)<br>[4]  | 4.3%<br>(1% placebo)<br>[9]     |
| Infections (E/100PY)                                | 26.5<br>[1]                   | 43.8<br>[2]       | 93.7<br>[3]                   | 101<br>[4]                     |                                 |
| Serious infection<br>(E/100PY)                      | 1.7<br>[1]                    | 2.4<br>[2]        | 3.8<br>[3]                    | 3.2<br>[4]                     |                                 |
| Opportunistic infections<br>(E/100PY)               | 0.1<br>[1]                    | <0.1<br>[2]       | 0.6<br>[3]                    | 0<br>[9]                       | 0.5<br>[9]                      |
| VTE (E/100PY)                                       | 0.2<br>[10]                   | 0.27<br>[2]       | 0.5<br>[7]                    | 0.6<br>[11]                    | 0.8<br>[11]                     |

<sup>a</sup> MTX-IR response rates at week 24/26 (placebo-corrected); all patients on background MTX.

<sup>b</sup> DAS28-hsCRP ≤ 3.2.

<sup>c</sup> Biologic-IR response rates at week 12 (placebo corrected); DAS28 CR, complete remission is defined as DAS28<2.6; tofacitinib, baricitinib uses DAS28-ESR and other JAKinibs use DAS28-CRP, dose-dependent decrease; E/100 PY, events per 100 patient years; JAK, Janus kinase; JAKinib; Janus kinase inhibitor; NK, natural killer; NR, not reported; VTE, venous thromboembolism.

<sup>d</sup> DAS28-ESR ≤ 3.2.

## References

1. Jyseleca (filgotinib) Summary of Product Characteristics. County Cork, Ireland: Gilead Sciences Ireland UC; 2020.
2. Xeljanz (tofacitinib) Summary of Product Characteristics. Brussels, Belgium: Pfizer Europe MA EEIG; 2020.
3. Rinvoq (upadacitinib) Summary of Product Characteristics. Ludwigshafen, Germany: AbbVie Deutschland GmbH & Co. KG; 2020.
4. Olumiant (baricitinib) Summary of Product Characteristics. Utrecht, The Netherlands: Eli Lilly Nederland B.V.; 2020.
5. Genovese MC, Kalunian K, Gottenberg JE, Mozaffarian N, Bartok B, Matzkies F, et al. Effect of filgotinib vs placebo on clinical response in patients with moderate to severe rheumatoid arthritis refractory to disease-modifying antirheumatic drug therapy: The FINCH 2 randomized clinical trial. *JAMA* 2019;322(4):315-25.
6. van Vollenhoven RF, Fleischmann R, Cohen S, Lee EB, Garcia Meijide JA, Wagner S, et al. Tofacitinib or adalimumab versus placebo in rheumatoid arthritis. *N Engl J Med* 2012;367(6):508-19.
7. Safety data from a large registrational clinical program in RA. RINVOQ (upadacitinib) 15 mg tablets. Available at: <https://www.rinvoqhcp.com/safety-profile>. Last accessed May 12, 2020.: AbbVie Inc; [Available from: <https://www.rinvoqhcp.com/safety-profile>.
8. Genovese MC, Kremer J, Zamani O, Ludivico C, Krogulec M, Xie L, et al. Baricitinib in patients with refractory rheumatoid arthritis. *N Engl J Med* 2016;374(13):1243-52.

9. Winthrop KL, Harigai M, Genovese MC, Lindsey S, Takeuchi T, Fleischmann R, et al. Infections in baricitinib clinical trials for patients with active rheumatoid arthritis *Ann Rheum Dis* 2020;79:1290–7.
10. Westhovens R, Taylor PC, Alten R, Pavlova D, Enriquez-Sosa F, Mazur M, et al. Filgotinib (GLPG0634/GS-6034), an oral JAK1 selective inhibitor, is effective in combination with methotrexate (MTX) in patients with active rheumatoid arthritis and insufficient response to MTX: results from a randomised, dose-finding study (DARWIN 1). *Ann Rheum Dis* 2017;76(6):998-1008.
11. Dougados M, van der Heijde D, Chen YC, Greenwald M, Drescher E, Liu J, et al. Baricitinib in patients with inadequate response or intolerance to conventional synthetic DMARDs: Results from the RA-BUILD study. *Ann Rheum Dis* 2017;76(1):88-95.

**Supplemental Table 2.** JAKinib IC<sub>50</sub> Values in CD4+ T Cells, Monocytes, and NK Cells From PBMC Assays.

|                                         | CD4+ T Cells          |     |        |      |     | Monocytes |      |        |      |     | NK Cells |      |        |      |     |
|-----------------------------------------|-----------------------|-----|--------|------|-----|-----------|------|--------|------|-----|----------|------|--------|------|-----|
|                                         | BARI                  | FIL | MET    | TOFA | UPA | BARI      | FIL  | MET    | TOFA | UPA | BARI     | FIL  | MET    | TOFA | UPA |
| Stimulation/pSTAT                       | IC <sub>50</sub> , nM |     |        |      |     |           |      |        |      |     |          |      |        |      |     |
| JAK2/2 or JAK2/TYK2-dependent cytokines |                       |     |        |      |     |           |      |        |      |     |          |      |        |      |     |
| G-CSF/pSTAT3                            | NS                    |     |        |      |     | 13        | 985  | 11,630 | 67   | 13  | NS       |      |        |      |     |
| GM-CSF/pSTAT5                           | NS                    |     |        |      |     | 51        | 5012 | 59,031 | 240  | 24  | NS       |      |        |      |     |
| JAK1/JAK2/TYK2-dependent cytokines      |                       |     |        |      |     |           |      |        |      |     |          |      |        |      |     |
| IFN $\alpha$ /pSTAT1                    | 20                    | 618 | 9539   | 44   | 8   | 47        | 1440 | 34,045 | 108  | 19  | 53       | 1360 | 23,053 | 122  | 40  |
| IFN $\alpha$ /pSTAT3                    | 17                    | 511 | 7720   | 39   | 7   | 8         | 275  | 4511   | 25   | 4   | NS       |      |        |      |     |
| IFN $\alpha$ /pSTAT5                    | 11                    | 338 | 5227   | 23   | 5   | 8         | 224  | 3478   | 17   | 3   | NS       |      |        |      |     |
| IFN $\gamma$ /pSTAT1                    | NS                    |     |        |      |     | 48        | 2785 | 41,945 | 165  | 26  | NS       |      |        |      |     |
| IL-6/pSTAT1                             | 18                    | 512 | 5746   | 40   | 9   | 16        | 547  | 5457   | 46   | 6   | NS       |      |        |      |     |
| IL-6/pSTAT3                             | NS                    |     |        |      |     | 53        | 1556 | 20,908 | 157  | 25  | NS       |      |        |      |     |
| JAK1/3-dependent cytokines              |                       |     |        |      |     |           |      |        |      |     |          |      |        |      |     |
| IL-2/pSTAT5                             | 16                    | 447 | 7316   | 18   | 5   | NS        |      |        |      |     | 27       | 875  | 11,473 | 31   | 13  |
| IL-4/pSTAT6                             | 29                    | 744 | 20,257 | 38   | 11  | 20        | 604  | 17,497 | 52   | 9   | 19       | 388  | 10,974 | 29   | 8   |
| IL-15/pSTAT5                            | 14                    | 453 | 7222   | 18   | 5   | NS        |      |        |      |     | 29       | 978  | 13,072 | 34   | 14  |

G-CSF, GM-CSF, IFN $\alpha$ , IFN $\gamma$ , IL-6, IL-2, IL-4, and IL-15, reported IC<sub>50</sub> values are based on the average of duplicate measures (N=3–5 healthy donors). Protein binding was not accounted for in the IC<sub>50</sub> calculations reported.

BARI, baricitinib; FIL: filgotinib; G-CSF, granulocyte colony stimulating factor; GM-CSF, granulocyte macrophage colony stimulating factor; IC<sub>50</sub>, half maximum inhibitory concentration; IFN, interferon; IL, interleukin; JAK, Janus kinase; MET, GS-829845 (filgotinib metabolite); NK, natural killer; NS, not sampled; PBMC, peripheral blood mononuclear cells; pSTAT, phosphorylated signal transducer and activator of transcription; TOFA, tofacitinib; TYK, tyrosine kinase; UPA, upadacitinib.

**Supplemental Table 3.** JAKinib IC<sub>50</sub> Values in B Cells, and CD8+ T Cells from PBMC Assays.

|                                    | B Cells               |      |        |      |     | CD8+ T Cells |     |        |      |     |
|------------------------------------|-----------------------|------|--------|------|-----|--------------|-----|--------|------|-----|
|                                    | BARI                  | FIL  | MET    | TOFA | UPA | BARI         | FIL | MET    | TOFA | UPA |
| Stimulation/pSTAT                  | IC <sub>50</sub> , nM |      |        |      |     |              |     |        |      |     |
| JAK1/3-dependent cytokines         |                       |      |        |      |     |              |     |        |      |     |
| IL-2/pSTAT5                        | NS                    |      |        |      |     | 13           | 395 | 5377   | 16   | 5   |
| IL-4/pSTAT6                        | 106                   | 2872 | 82,459 | 172  | 43  | 19           | 470 | 11,836 | 29   | 9   |
| IL-15/pSTAT5                       | NS                    |      |        |      |     | 20           | 685 | 10,370 | 25   | 8   |
| JAK1/JAK2/TYK2-dependent cytokines |                       |      |        |      |     |              |     |        |      |     |
| IFNα/pSTAT1                        | 56                    | 1548 | 30,698 | 136  | 30  | 23           | 646 | 9465   | 45   | 10  |
| IFNα/pSTAT3                        | 13                    | 380  | 6106   | 31   | 6   | 16           | 453 | 6628   | 36   | 8   |
| IFNα/pSTAT5                        | 9                     | 255  | 4083   | 21   | 4   | 11           | 302 | 4236   | 21   | 5   |
| IFNγ/pSTAT1                        | 11                    | 629  | 9303   | 38   | 9   | NS           |     |        |      |     |

IFN $\alpha$ , IFN $\gamma$ , IL-2, IL-4, and IL-15, reported IC<sub>50</sub> values are based on the average of duplicate measures (N=3–5 healthy donors). Protein binding was not accounted for in the IC<sub>50</sub> calculations reported.

BARI, baricitinib; FIL, filgotinib; IC<sub>50</sub>, half maximum inhibitory concentration; IFN, interferon; IL, interleukin; JAK, Janus kinase; MET, GS-829845 (filgotinib metabolite); NS, not sampled; PBMC, peripheral blood mononuclear cells; pSTAT, phosphorylated signal transducer and activator of transcription; TOFA, tofacitinib; TYK2, tyrosine kinase 2; UPA, upadacitinib.

**Supplemental Table 4.** JAKinib Potency Differences Based on Cell Type.

| Stimuli      | pSTAT | Cell type A | Cell type B | BARI | FIL | MET | TOFA | UPA |
|--------------|-------|-------------|-------------|------|-----|-----|------|-----|
| G-CSF        | STAT3 | neutrophils | Monocytes   | ***  | *** | *** | ***  | *** |
| GM-CSF       | STAT5 | Monocytes   | neutrophils | ***  | *** | *** | ***  | *** |
| IFN $\alpha$ | STAT1 | B cells     | CD4+ cells  | ***  | *** | *** | ***  | *** |
|              |       | B cells     | CD8+ cells  | ***  | *** | *** | ***  | *** |
|              |       | Monocytes   | B cells     |      | **  | **  |      |     |
|              |       | B cells     | NK cells    |      |     |     |      |     |
|              |       | CD8+ cells  | CD4+ cells  | *    | *   |     | *    | **  |
|              |       | Monocytes   | CD4+ cells  | ***  | *** | *** | ***  | *** |
|              |       | NK cells    | CD4+ cells  | ***  | *** | *** | ***  | *** |
|              |       | Monocytes   | CD8+ cells  | ***  | *** | *** | ***  | *** |
|              |       | NK cells    | CD8+ cells  | ***  | *** | *** | ***  | *** |
|              |       | Monocytes   | NK cells    | *    | *** | *** | *    | *   |
|              | STAT3 | CD4+ cells  | B cells     |      | **  |     |      |     |
|              |       | CD8+ cells  | B cells     |      |     |     |      |     |
|              |       | Monocytes   | B cells     |      | *** | **  |      |     |
|              |       | NK cells    | B cells     |      |     |     |      |     |
|              |       | neutrophils | B cells     | **   | *   | **  |      |     |
|              |       | CD4+ cells  | CD8+ cells  |      |     |     |      |     |
|              |       | Monocytes   | CD4+ cells  |      |     |     |      |     |
|              |       | CD4+ cells  | NK cells    |      | **  | *   |      |     |
|              |       | neutrophils | CD4+ cells  |      |     |     |      |     |
|              |       | Monocytes   | CD8+ cells  |      |     | *   |      |     |
|              |       | CD8+ cells  | NK cells    |      |     |     |      |     |
|              |       | neutrophils | CD8+ cells  |      |     | *   |      |     |
|              |       | Monocytes   | NK cells    |      | *** | *** |      | *   |
|              |       | neutrophils | Monocytes   |      |     |     |      |     |
|              |       | neutrophils | NK cells    | *    | *   | *** |      | *   |
|              | STAT5 | CD4+ cells  | B cells     |      | **  |     |      |     |
|              |       | CD8+ cells  | B cells     |      | *   |     |      |     |
|              |       | Monocytes   | B cells     |      | *   |     |      | *   |
|              |       | NK cells    | B cells     | *    |     |     |      | **  |
|              |       | CD4+ cells  | CD8+ cells  |      |     |     |      |     |
|              |       | CD4+ cells  | Monocytes   |      |     |     |      | **  |
|              |       | NK cells    | CD4+ cells  |      |     |     |      | *   |
|              |       | CD8+ cells  | Monocytes   |      |     |     |      | **  |
|              |       | NK cells    | CD8+ cells  |      |     |     |      | *   |
|              |       | NK cells    | Monocytes   |      |     |     |      | *** |
| IFN $\gamma$ | STAT1 | Monocytes   | B cells     | ***  | *** | *** | ***  | *** |
|              |       | neutrophils | B cells     | ***  | *** | *** | ***  | *** |
|              |       | Monocytes   | neutrophils |      |     |     | **   |     |

|       |       |             |             |     |     |     |     |     |
|-------|-------|-------------|-------------|-----|-----|-----|-----|-----|
| IL-15 | STAT5 | CD8+ cells  | CD4+ cells  | **  | *** | *   | **  | **  |
|       |       | NK cells    | CD4+ cells  | *** | *** | *** | *** | *** |
|       |       | NK cells    | CD8+ cells  | *   | *   |     | **  | *** |
| IL-2  | STAT5 | CD4+ cells  | CD8+ cells  |     |     |     |     |     |
|       |       | NK cells    | CD4+ cells  | *** | *** | *** | *** | *** |
|       |       | NK cells    | CD8+ cells  | *** | *** | *** | *** | *** |
| IL-4  | STAT6 | B cells     | CD4+ cells  | *** | *** | *** | *** | *** |
|       |       | B cells     | CD8+ cells  | *** | *** | *** | *** | *** |
|       |       | B cells     | Monocytes   | *** | *** | *** | *** | *** |
|       |       | B cells     | NK cells    | *** | *** | *** | *** | *** |
|       |       | B cells     | neutrophils | *** | *** | *** | *** | *** |
|       |       | CD4+ cells  | CD8+ cells  | *   |     | *   | *   |     |
|       |       | CD4+ cells  | Monocytes   |     |     |     | **  |     |
|       |       | CD4+ cells  | NK cells    | *** | *** | *** | **  |     |
|       |       | CD4+ cells  | neutrophils |     |     |     |     |     |
|       |       | Monocytes   | CD8+ cells  |     |     |     | *** |     |
|       |       | CD8+ cells  | NK cells    |     |     |     |     |     |
|       |       | neutrophils | CD8+ cells  |     |     |     | *** |     |
|       |       | Monocytes   | NK cells    |     | *   | *** | *** |     |
|       |       | neutrophils | Monocytes   |     |     |     |     |     |
|       |       | neutrophils | NK cells    | **  |     | **  | *** |     |
| IL-6  | STAT1 | Monocytes   | CD4+ cells  | *   | *   | *** | *   |     |
|       | STAT3 | CD4+ cells  | Monocytes   | *** | *** | *   | *** | *** |

Comparisons between mean IC<sub>50</sub> values of different cell types in response to the same stimuli were performed using a 2-way mixed effect Analysis of Variance (ANOVA). Analysis based on in vitro whole blood measurements in healthy donors.

N=7–10 donors. \**P*<0.05, \*\**P*<0.01, \*\*\**P*<0.001

BARI, baricitinib; FIL, filgotinib; IFN, interferon; IL, interleukin; JAK, Janus kinase; JAKinib; Janus kinase inhibitor; MET, GS-829845 (filgotinib metabolite); NK, natural killer; pSTAT, phosphorylated signal transducer and activator of transcription; TOFA, tofacitinib; UPA, upadacitinib.

**Supplemental Table 5.** JAKinib Potency Differences Based on STAT Substrate.

| Stimuli      | Cell type | STAT A | STAT B | BARI | FIL | MET | TOFA | UPA |
|--------------|-----------|--------|--------|------|-----|-----|------|-----|
| IFN $\alpha$ | B cells   | STAT1  | STAT3  | ***  | *** | *** | ***  | *** |
|              | B cells   | STAT1  | STAT5  | ***  | *** | *** | ***  | *** |
|              | B cells   | STAT3  | STAT5  |      |     |     | *    |     |
|              | CD4+      | STAT1  | STAT3  |      |     |     |      |     |
|              | CD4+      | STAT1  | STAT5  | **   | **  | **  | ***  | **  |
|              | CD4+      | STAT3  | STAT5  | *    |     |     | **   | *   |
|              | CD8+      | STAT1  | STAT3  | ***  | **  | **  | **   | *** |
|              | CD8+      | STAT1  | STAT5  | ***  | *** | *** | ***  | *** |
|              | CD8+      | STAT3  | STAT5  |      |     |     | **   | *   |
|              | NK cells  | STAT1  | STAT3  | ***  | *** | *** | ***  | *** |
|              | NK cells  | STAT1  | STAT5  | ***  | *** | *** | ***  | *** |
|              | NK cells  | STAT3  | STAT5  |      |     |     |      |     |
|              | monocytes | STAT1  | STAT3  | ***  | *** | *** | ***  | *** |
|              | monocytes | STAT1  | STAT5  | ***  | *** | *** | ***  | *** |
|              | monocytes | STAT3  | STAT5  | **   | *   | *   | **   | **  |
| IL-6         | CD4+      | STAT3  | STAT1  | ***  | *** | *** | ***  | *** |
|              | monocytes | STAT3  | STAT1  | ***  | *** | *** | ***  | *** |

Comparisons between mean IC<sub>50</sub> values of different STATs activated in the same cell time and in response to the same stimuli were performed using a 2-way mixed effect ANOVA. Analysis based on in vitro whole blood measurements in healthy donors.

N=7–10 donors. \* $P<0.05$ , \*\* $P<0.01$ , \*\*\* $P<0.001$

BARI, baricitinib; FIL, filgotinib; IFN, interferon; IL, interleukin; JAK, Janus kinas; JAKinib; Janus kinase inhibitor; MET, GS-829845 (filgotinib metabolite); NK, natural killer; STAT, signal transducer and activator of transcription; TOFA, tofacitinib; UPA, upadacitinib.

**Supplemental Table 6.** JAKinib Potencies Impacted by Stimuli Utilizing the Same JAK Pair.

| Cell type | STAT  | Stimuli A    | Stimuli B | BARI | FIL | MET | TOFA | UPA |
|-----------|-------|--------------|-----------|------|-----|-----|------|-----|
| Monocytes | STAT1 | IFN $\gamma$ | IL-6      | **   | *** | *** | ***  | *** |

Comparisons between mean IC<sub>50</sub> values observed for monocytes in response to 2 different stimuli signaling through the same JAK/STAT pair (JAK1/JAK2) were performed using a 2-way mixed effect ANOVA. Analysis based on in vitro whole blood measurements in healthy donors.

N=7–10 donors. \*\* $P$ <0.01, \*\*\* $P$ <0.001

BARI, baricitinib; FIL, filgotinib; IFN, interferon; IL, interleukin; JAK, Janus kinase; JAKinib, Janus kinase inhibitor; MET, GS-829845 (filgotinib metabolite); NK, natural killer; STAT, signal transducer and activator of transcription; TOFA, tofacitinib; UPA, upadacitinib.



**Supplemental Table 7.** Heatmap of Time Above 50% Inhibition at Clinical Doses of JAKinibs.

| Signaling Pair | Cell Type      | Stimuli Readout | Filgotinib <sup>M</sup> |       | Tofacitinib     |                 | Upadacitinib    |                 | Baricitinib    |                 |
|----------------|----------------|-----------------|-------------------------|-------|-----------------|-----------------|-----------------|-----------------|----------------|-----------------|
|                |                |                 | 100mg                   | 200mg | 5mg             | 10mg            | 15mg            | 30mg            | 2mg            | 4mg             |
| JAK1/TYK2      | B cells        | IFNα/pSTAT5     | 7 <sup>†</sup>          | 20    | 16 <sup>†</sup> | 23              | 16 <sup>†</sup> | 24*             | 9 <sup>†</sup> | 19              |
|                | NK             | IFNα/pSTAT5     | 7 <sup>†</sup>          | 20    | 14 <sup>†</sup> | 22              | 12 <sup>†</sup> | 18              | 5 <sup>†</sup> | 13 <sup>†</sup> |
|                | CD8+ T cells   | IFNα/pSTAT5     | 6 <sup>†</sup>          | 17    | 15              | 22*             | 15              | 23*             | 8 <sup>†</sup> | 16              |
|                | NK             | IFNα/pSTAT3     | 6 <sup>†</sup>          | 17    | 13 <sup>†</sup> | 20*             | 11 <sup>†</sup> | 18              | 7 <sup>†</sup> | 16              |
|                | monocytes      | IFNα/pSTAT5     | 5 <sup>†</sup>          | 12    | 14              | 21*             | 21*             | 24*             | 8 <sup>†</sup> | 18*             |
|                | CD4+ T cells   | IFNα/pSTAT5     | 5 <sup>†</sup>          | 12    | 14*             | 22*             | 15*             | 23*             | 7 <sup>†</sup> | 16*             |
|                | B cells        | IFNα/pSTAT3     | 5 <sup>†</sup>          | 13    | 12              | 19*             | 13              | 21*             | 7 <sup>†</sup> | 16*             |
|                | CD8+ T cells   | IFNα/pSTAT3     | 4 <sup>†</sup>          | 10    | 10              | 17*             | 12              | 19*             | 5 <sup>†</sup> | 13*             |
|                | neutrophils    | IFNα/pSTAT3     | 4 <sup>†</sup>          | 8     | 12*             | 19*             | 15*             | 22*             | 3 <sup>†</sup> | 10              |
|                | CD4+ T cells   | IFNα/pSTAT3     | 3 <sup>†</sup>          | 7     | 9               | 16*             | 12*             | 19*             | 4 <sup>†</sup> | 12*             |
|                | monocytes      | IFNα/pSTAT3     | 3 <sup>†</sup>          | 7     | 10*             | 17*             | 16*             | 23*             | 4              | 12*             |
|                | CD4+ T cells   | IFNα/pSTAT1     | 3 <sup>†</sup>          | 7     | 7               | 15*             | 11*             | 17*             | 2 <sup>†</sup> | 9               |
|                | CD8+ T cells   | IFNα/pSTAT1     | 2 <sup>†</sup>          | 6     | 5               | 12*             | 8               | 14*             | 1 <sup>†</sup> | 7               |
|                | NK             | IFNα/pSTAT1     | 0                       | 1     | 0               | 2               | 1               | 3               | 0              | 0               |
|                | B cells        | IFNα/pSTAT1     | 0                       | 1     | 0               | 2               | 2               | 6*              | 0              | 0               |
|                | monocytes      | IFNα/pSTAT1     | 0                       | 0     | 0               | 1               | 4*              | 8*              | 0              | 0               |
| JAK1/JAK2      | CD4+ T cells   | IL-6/pSTAT1     | 11 <sup>†</sup>         | 24    | 13 <sup>†</sup> | 20 <sup>†</sup> | 12 <sup>†</sup> | 18 <sup>†</sup> | 9 <sup>†</sup> | 17 <sup>†</sup> |
|                | monocytes      | IL-6/pSTAT1     | 5 <sup>†</sup>          | 15    | 9 <sup>†</sup>  | 17              | 13              | 21*             | 5 <sup>†</sup> | 13              |
|                | monocytes      | IL-6/pSTAT3     | 0                       | 0     | 0               | 2               | 3*              | 8*              | 0              | 0               |
|                | B cells        | IFNγ/pSTAT1     | 4 <sup>†</sup>          | 9     | 13*             | 20*             | 13*             | 21*             | 12*            | 21*             |
|                | neutrophils    | IFNγ/pSTAT1     | 0                       | 1     | 3               | 11*             | 8*              | 14*             | 1              | 5*              |
|                | monocytes      | IFNγ/pSTAT1     | 0                       | 0     | 0               | 6*              | 6*              | 11*             | 0              | 5*              |
| JAK1/JAK3      | CD8+ T cells   | IL-2/pSTAT5     | 2 <sup>†</sup>          | 5     | 14*             | 21*             | 11*             | 18*             | 2 <sup>†</sup> | 19*             |
|                | CD4+ T cells   | IL-2/pSTAT5     | 3 <sup>†</sup>          | 7     | 17*             | 23*             | 14*             | 21*             | 4 <sup>†</sup> | 11*             |
|                | NK             | IL-2/pSTAT5     | 0                       | 2     | 8*              | 16*             | 6*              | 11*             | 0              | 4               |
|                | CD4+ T cells   | IL-15/pSTAT5    | 3 <sup>†</sup>          | 9     | 19*             | 24*             | 15*             | 23*             | 5 <sup>†</sup> | 13*             |
|                | CD8+ T cells   | IL-15/pSTAT5    | 0 <sup>†</sup>          | 4     | 13*             | 21*             | 10*             | 16*             | 1 <sup>†</sup> | 7*              |
|                | NK             | IL-15/pSTAT5    | 0                       | 2     | 8*              | 16*             | 6*              | 11*             | 0              | 3               |
|                | NK             | IL-4/pSTAT6     | 3 <sup>†</sup>          | 6     | 15*             | 22*             | 12*             | 18*             | 4              | 12*             |
|                | CD8+ T cells   | IL-4/pSTAT6     | 4 <sup>†</sup>          | 9     | 19*             | 24*             | 13*             | 21*             | 6 <sup>†</sup> | 14*             |
|                | neutrophils    | IL-4/pSTAT6     | 1                       | 4     | 7*              | 15*             | 10*             | 16*             | 1              | 7               |
|                | monocytes      | IL-4/pSTAT6     | 1 <sup>†</sup>          | 4     | 5               | 13*             | 10*             | 16*             | 1              | 8*              |
|                | CD4+ T cells   | IL-4/pSTAT6     | 0 <sup>†</sup>          | 3     | 10*             | 17*             | 9*              | 15*             | 0 <sup>†</sup> | 5               |
|                | B cells        | IL-4/pSTAT6     | 0                       | 0     | 1               | 3*              | 2               | 5*              | 0              | 1               |
| JAK2/TYK2      | monocytes      | G-CSF/pSTAT3    | 0                       | 0     | 1               | 4*              | 4*              | 9*              | 1              | 4*              |
|                | neutrophils    | G-CSF/pSTAT3    | 0                       | 0     | 0               | 0               | 0               | 1               | 0              | 0               |
|                | NK             | IL-12/pSTAT4    | 0                       | 0     | 0               | 0               | 0               | 0               | 0              | 0               |
|                | CD8+ m T cells | IL-23/pSTAT3    | 0                       | 0     | 0               | 0               | 0               | 0               | 0              | 0               |
| JAK2/JAK2      | neutrophils    | GM-CSF/pSTAT5   | 0                       | 1     | 3               | 11*             | 14*             | 21*             | 0              | 6*              |
|                | monocytes      | GM-CSF/pSTAT5   | 0                       | 0     | 0               | 0               | 5*              | 9*              | 0              | 0               |

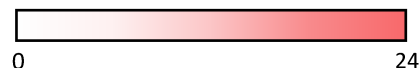

Heatmap represents time (hours) above 50% target inhibition by JAKinibs at clinical doses over a 24-hour dose period (based on in vitro WB measurements, N=6–10). FIL includes the metabolite exposure/activity calculation.

\* $P < 0.05$  higher vs FIL 200 mg; <sup>†</sup> $P < 0.05$  lower vs FIL 200 mg

IFN, interferon; IL, interleukin; JAK, Janus kinase; JAKinib; Janus kinase inhibitor; NK, natural killer; pSTAT, phosphorylated signal transducer and activator of transcription; TYK2, tyrosine kinase 2.

Supplemental Figure 1.

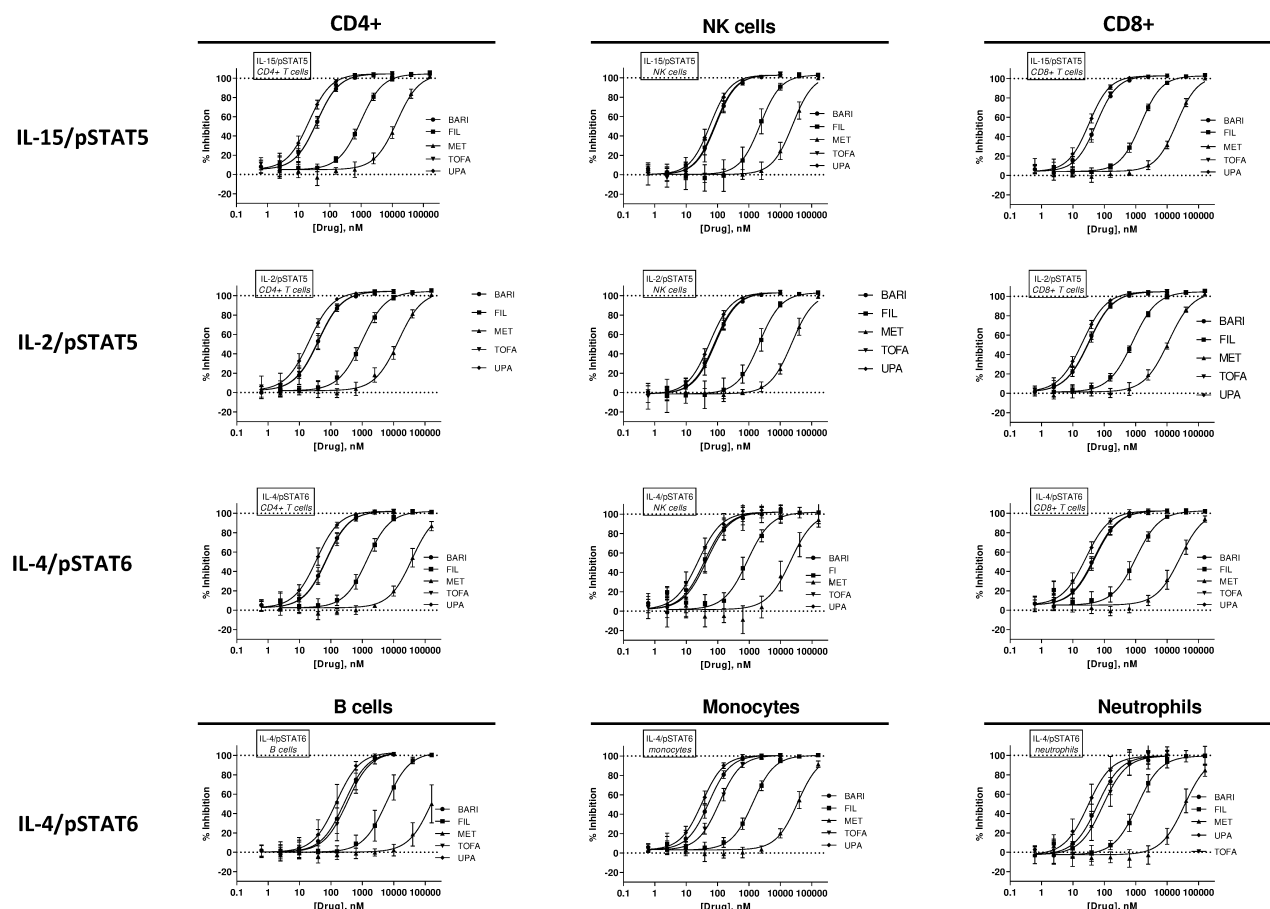

JAKinib dose-response curves for STAT phosphorylation in response to JAK1/JAK3 dependent cytokines IL-2(pSTAT5), IL-4(pSTAT6) and IL-15(pSTAT5). Graphs represent percent pSTAT inhibition in whole blood from  $n=7-10$  healthy volunteers. The percent inhibition values were calculated from duplicate wells of an 8-point dose response of each JAKinib and normalized to the difference in MFI measurements of cytokine stimulated minus unstimulated samples. Error bars represented SD. A four-parameter logistic fit model with shared upper and lower asymptotes and hillslope were used to fit the composite data.

Supplemental Figure 2.

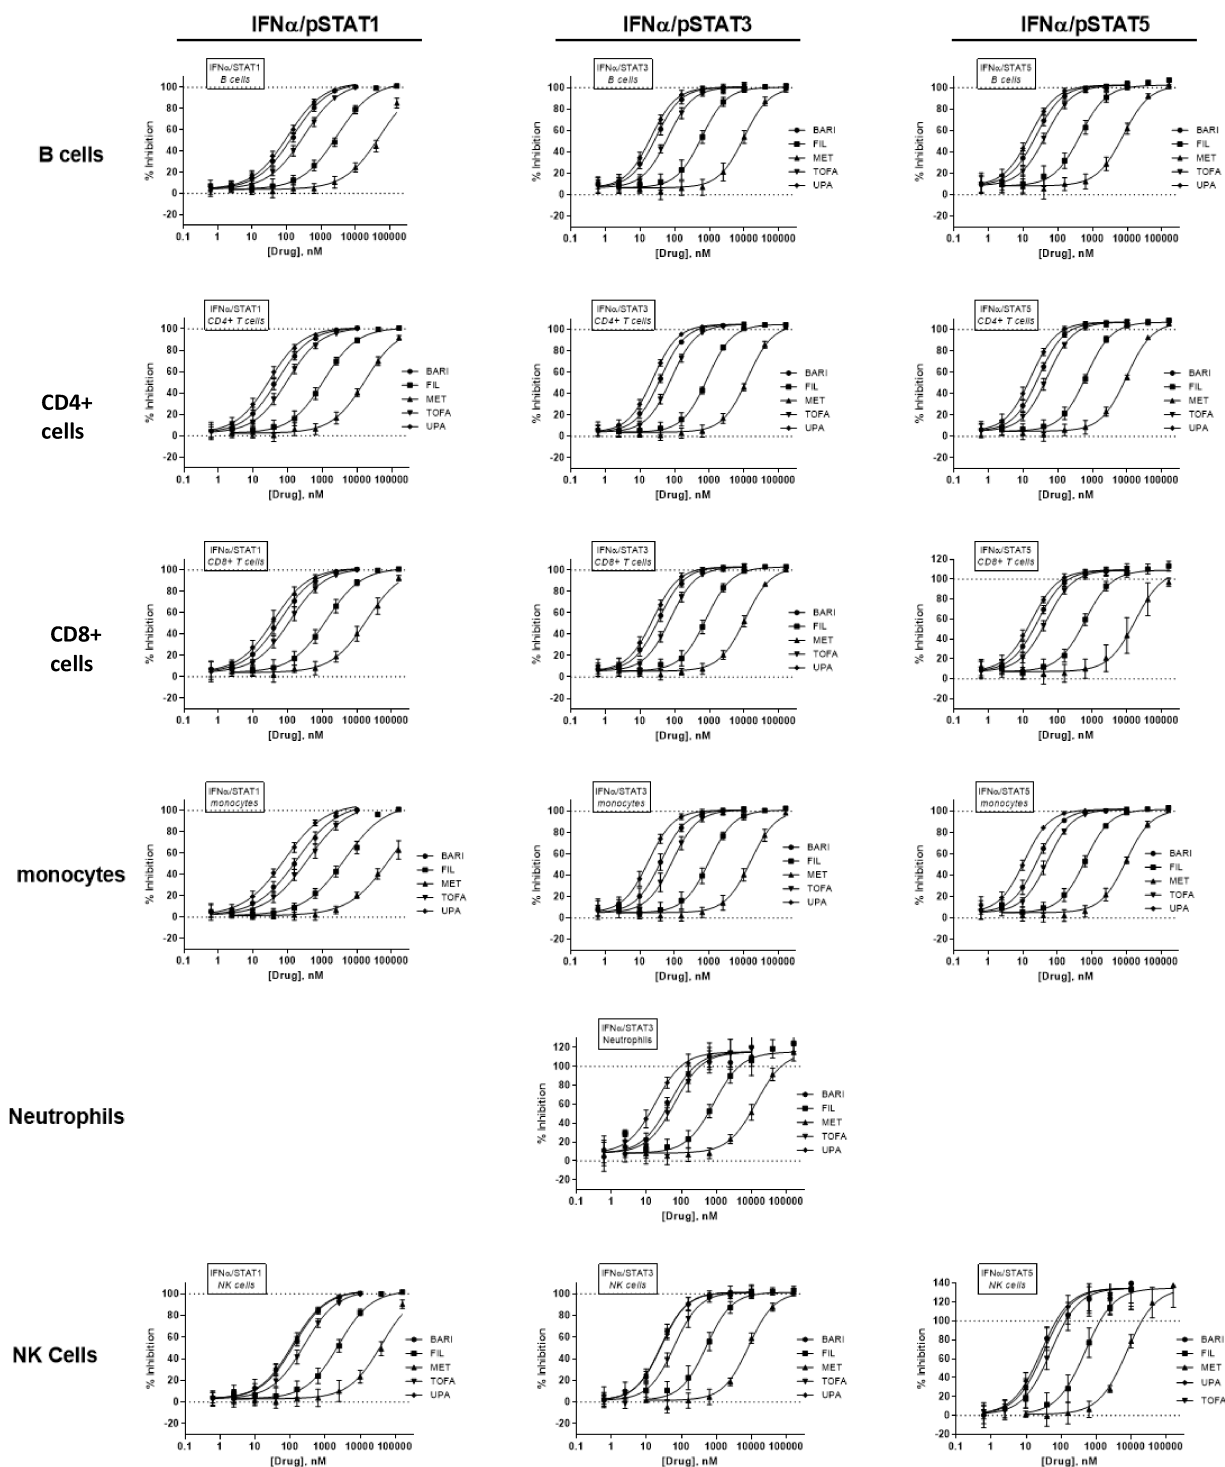

JAKinib dose-response curves for STAT (pSTAT1, pSTAT3, pSTAT5) phosphorylation in response to JAK1/TYK2 dependent cytokine IFNα. Graphs represent percent pSTAT inhibition in whole blood from n=9–10 healthy volunteers. In this figure, as well as

Supplemental Figures 3 and 4, the percent inhibition values were calculated from duplicate wells of an 8-point dose response of each JAKinib and normalized to the difference in MFI measurements of cytokine stimulated minus unstimulated samples. Error bars represented SD. A 4-parameter logistic fit model with shared upper and lower asymptotes and hillslope were used to fit the composite data.

BARI, baricitinib; FIL, filgotinib; IL, interleukin; JAK, Janus kinase; JAKinib, Janus kinase inhibitor; MET, GS-829845 (filgotinib metabolite); NK, natural killer; pSTAT, phosphorylated signal transducer and activator of transcription; TOFA, tofacitinib; TYK2, tyrosine kinase 2; UPA, upadacitinib.

Supplemental Figure 3.

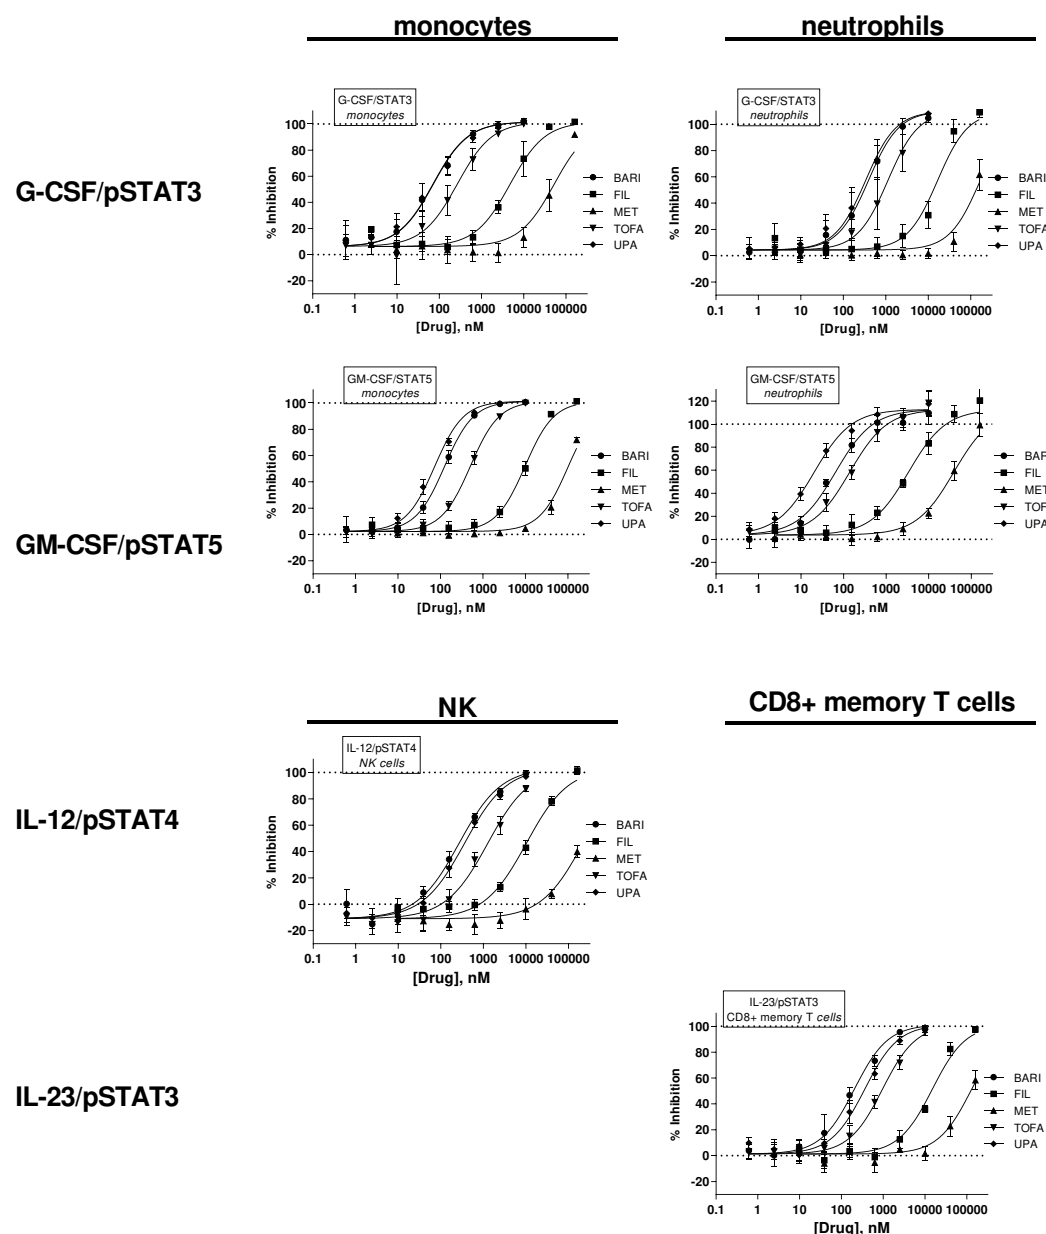

JAKinib dose-response curves for STAT phosphorylation in response to JAK2/TYK2-dependent cytokines G-CSF (pSTAT3), IL-12 (pSTAT4), and IL-23 (pSTAT3) and JAK2/JAK2-dependent GM-CSF (pSTAT5). Graphs represent percent pSTAT inhibition in whole blood from n=6–10 healthy volunteers.

BARI, baricitinib; FIL, filgotinib; IL, interleukin; G-CSF, granulocyte-colony stimulating factor; GM-CSF, granulocyte macrophage-CSF; JAK, Janus kinase; JAKinib, Janus kinase inhibitor; MET, GS-829845 (filgotinib metabolite); NK, natural killer; pSTAT, phosphorylated signal transducer and activator of transcription; TOFA, tofacitinib; TYK2, tyrosine kinase 2; UPA, upadacitinib.

Supplemental Figure 4.

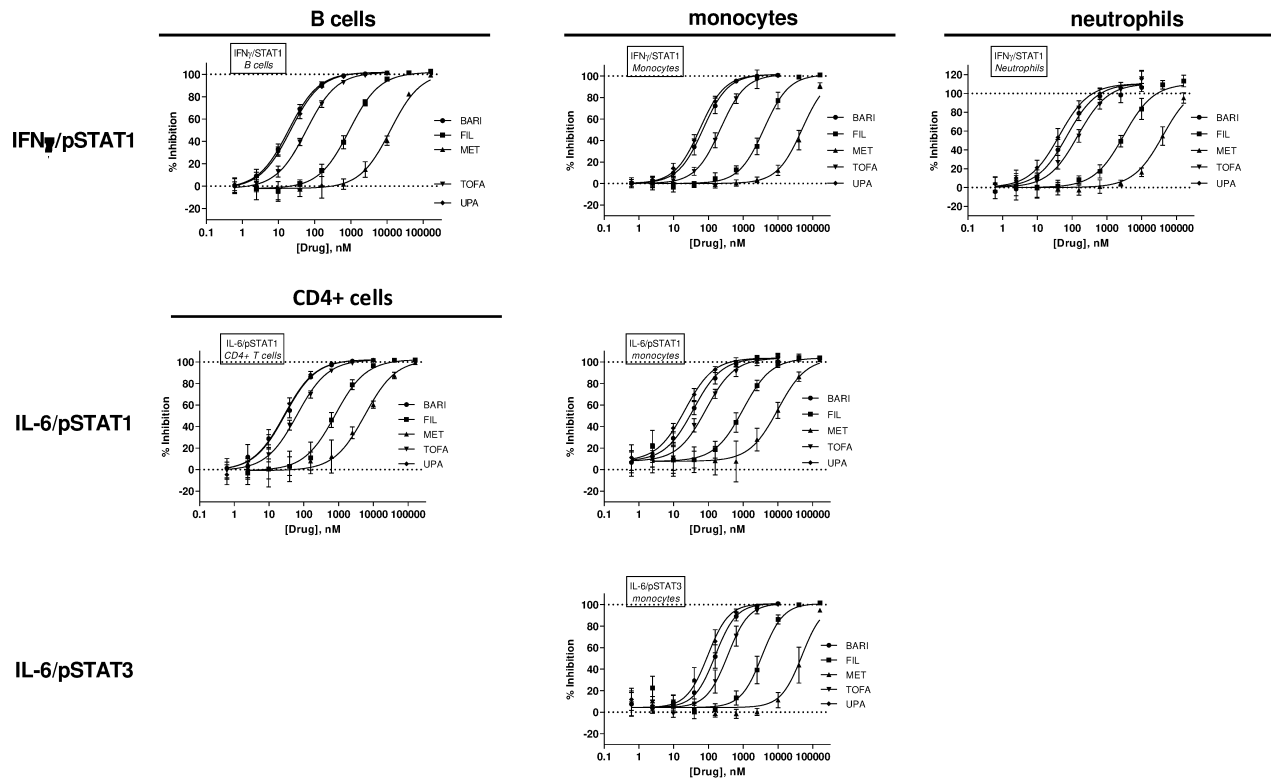

JAKinib dose-response curves for STAT phosphorylation in response to JAK1/JAK2 dependent cytokines IFN $\gamma$  (pSTAT1) and IL-6 (pSTAT1, pSTAT3). Graphs represent percent pSTAT inhibition in whole blood from n=7–10 healthy volunteers. BARI, baricitinib; FIL, filgotinib; IL, interleukin; INF, interferon; JAK, Janus kinase; JAKinib; Janus kinase inhibitor; MET, GS-829845 (filgotinib metabolite); pSTAT, phosphorylated signal transducer and activator of transcription; TOFA, tofacitinib; TYK2, tyrosine kinase 2; UPA, upadacitinib.

Supplemental Figure 5.

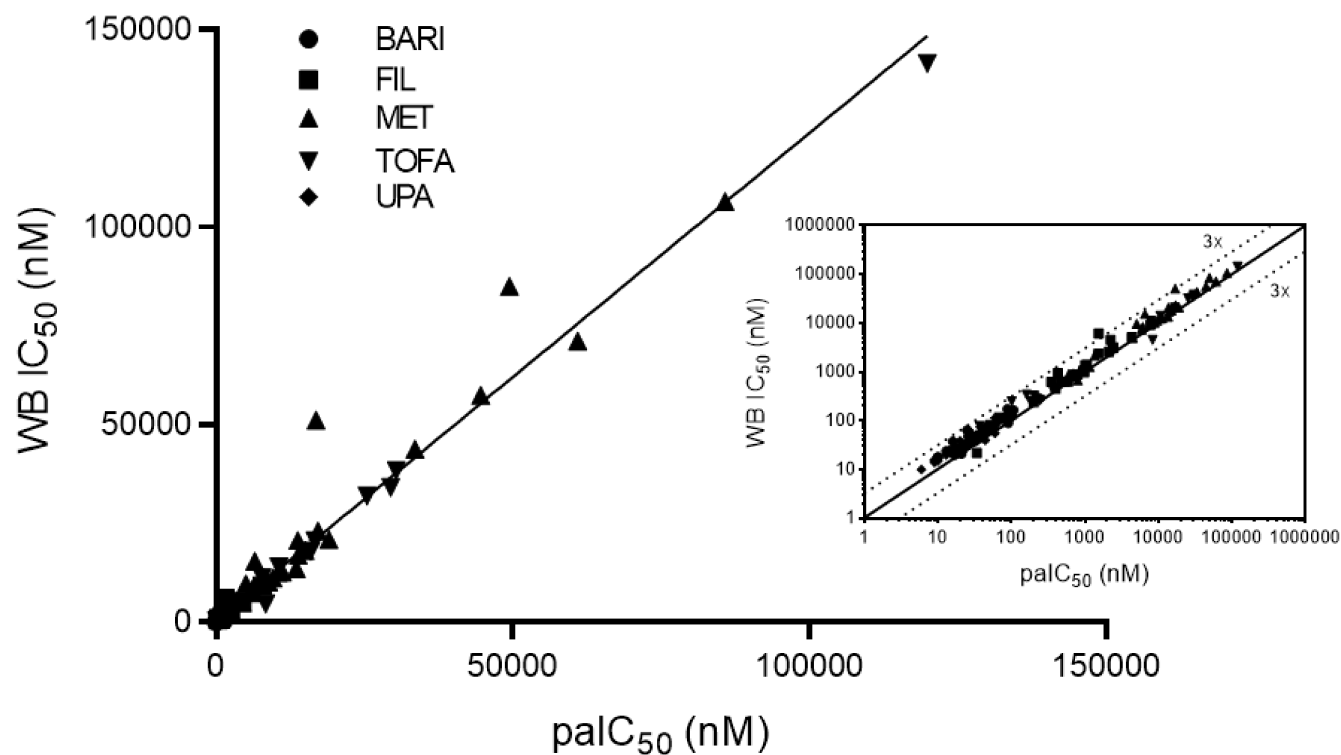

palC<sub>50</sub> values from PBMCs (n=5 donors) were compared to IC<sub>50</sub> values in whole blood from the same donors (n=5). Pearson's analysis indicated a coefficient of determination  $r^2=0.98$ .

BARI, baricitinib; FIL, filgotinib; ; IC<sub>50</sub>, half maximum inhibitory concentration; MET, GS-829845 (filgotinib metabolite); NK, natural killer; palC<sub>50</sub>, plasma binding-adjusted IC<sub>50</sub>; PBMCs, peripheral blood mononuclear cells; TOFA, tofacitinib; UPA, upadacitinib; WB, whole blood.



Supplemental Figure 6.

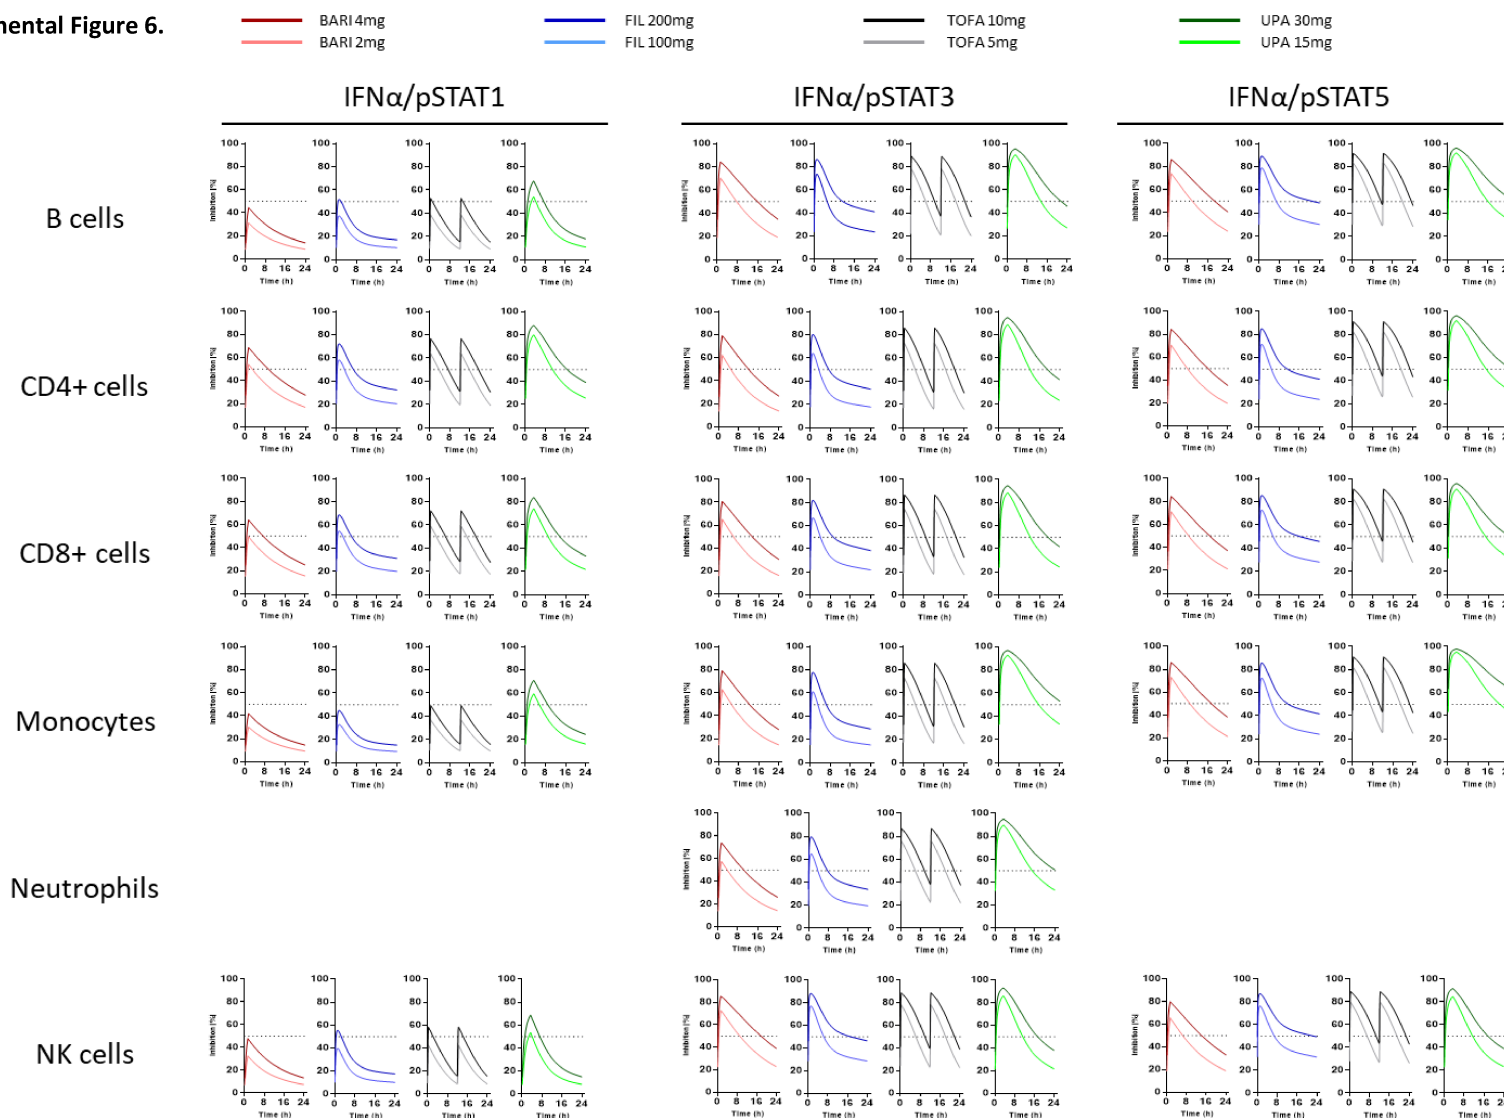

Inhibition curves of IFN $\alpha$ -induced STAT phosphorylation by JAKinibs (24-hour dose interval) at clinical doses (calculated based on in vitro WB measurements) from healthy volunteers) n=9–10 donors. In this figure, as well as Supplemental Figures 7-9, filgotinib takes into consideration the presence of the active human metabolite, GS-829845, and its potency. Curves above the dashed line (at 50%) indicates the time above 50% target coverage of each JAKinib during the dose interval.

BARI, baricitinib; FIL, filgotinib; IFN, interferon; JAK, Janus kinase; JAKinib; Janus kinase inhibitor; NK, natural killer; pSTAT, phosphorylated signal transducer and activator of transcription; TOFA, tofacitinib; UPA, upadacitinib; WB, whole blood.

Supplemental Figure 7.

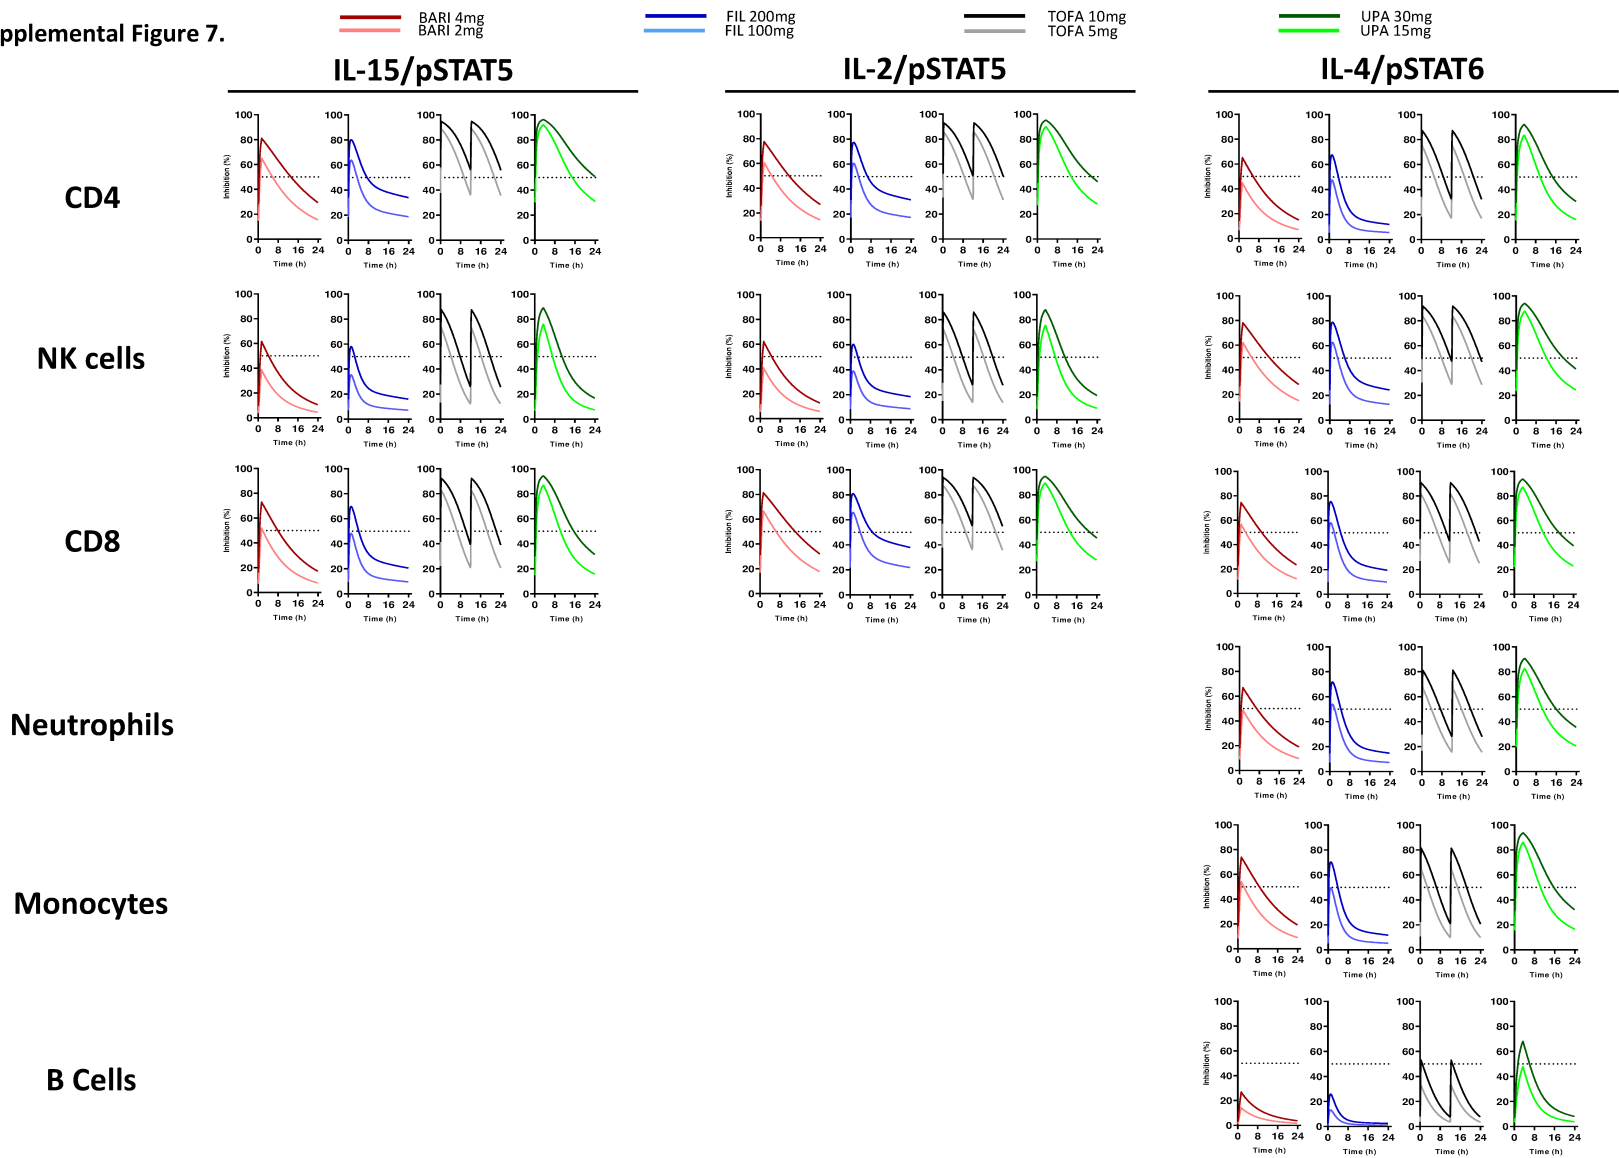

Inhibition curves of IL-2, IL-4 and IL-15-induced STAT phosphorylation by JAKinibs (24 h dose interval) at clinical doses (calculated based on in vitro WB measurements) from healthy volunteers). N=7–10 donors. BARI, baricitinib; FIL, filgotinib; IL, interleukin; JAK, Janus kinase; JAKinib; Janus kinase inhibitor; NK, natural killer; pSTAT, phosphorylated signal transducer and activator of transcription; TOFA, tofacitinib; UPA, upadacitinib; WB, whole blood.

Supplemental Figure 8.

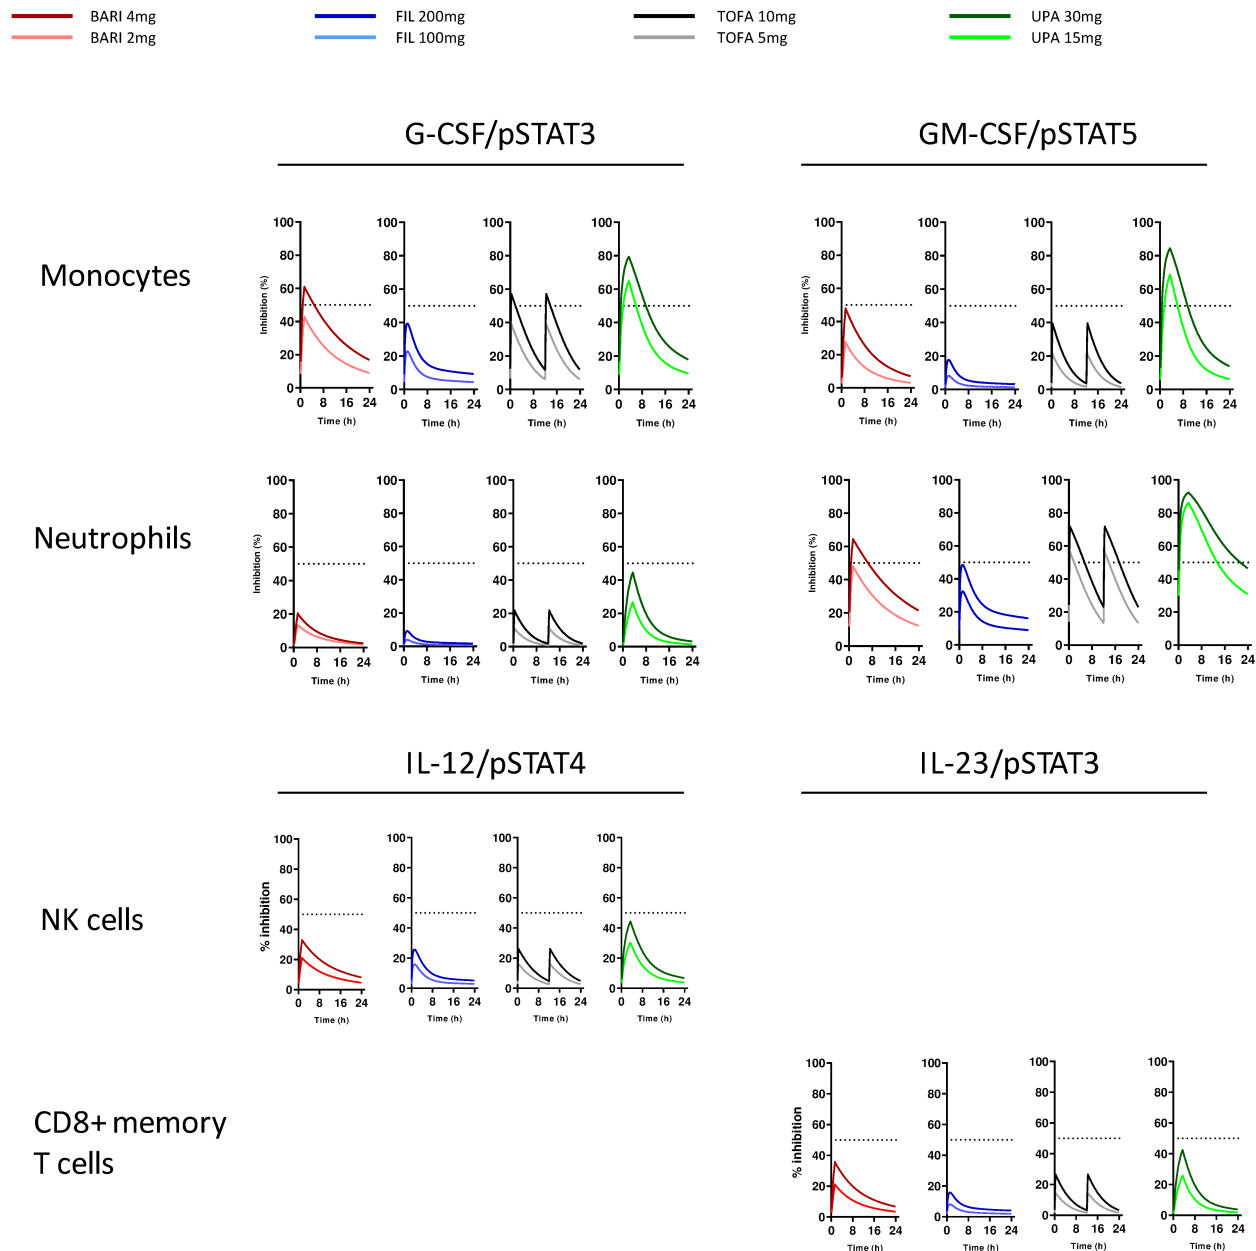

Inhibition curves of G-CSF, IL-12, IL-23 and GM-CSF-induced STAT phosphorylation by JAKinibs (24-hour dose intervals) at clinical doses (calculated based on in vitro WB measurements from healthy volunteers). N=6–10 donors.  
BARI, baricitinib; FIL, filgotinib; IL, interleukin; G-CSF, granulocyte-colony stimulating factor; GM-CSF, granulocyte macrophage-CSF; JAK, Janus kinase; JAKinib; Janus kinase inhibitor; NK, natural killer; pSTAT, phosphorylated signal transducer and activator of transcription; TOFA, tofacitinib; UPA, upadacitinib; WB, whole blood.

Supplemental Figure 9.

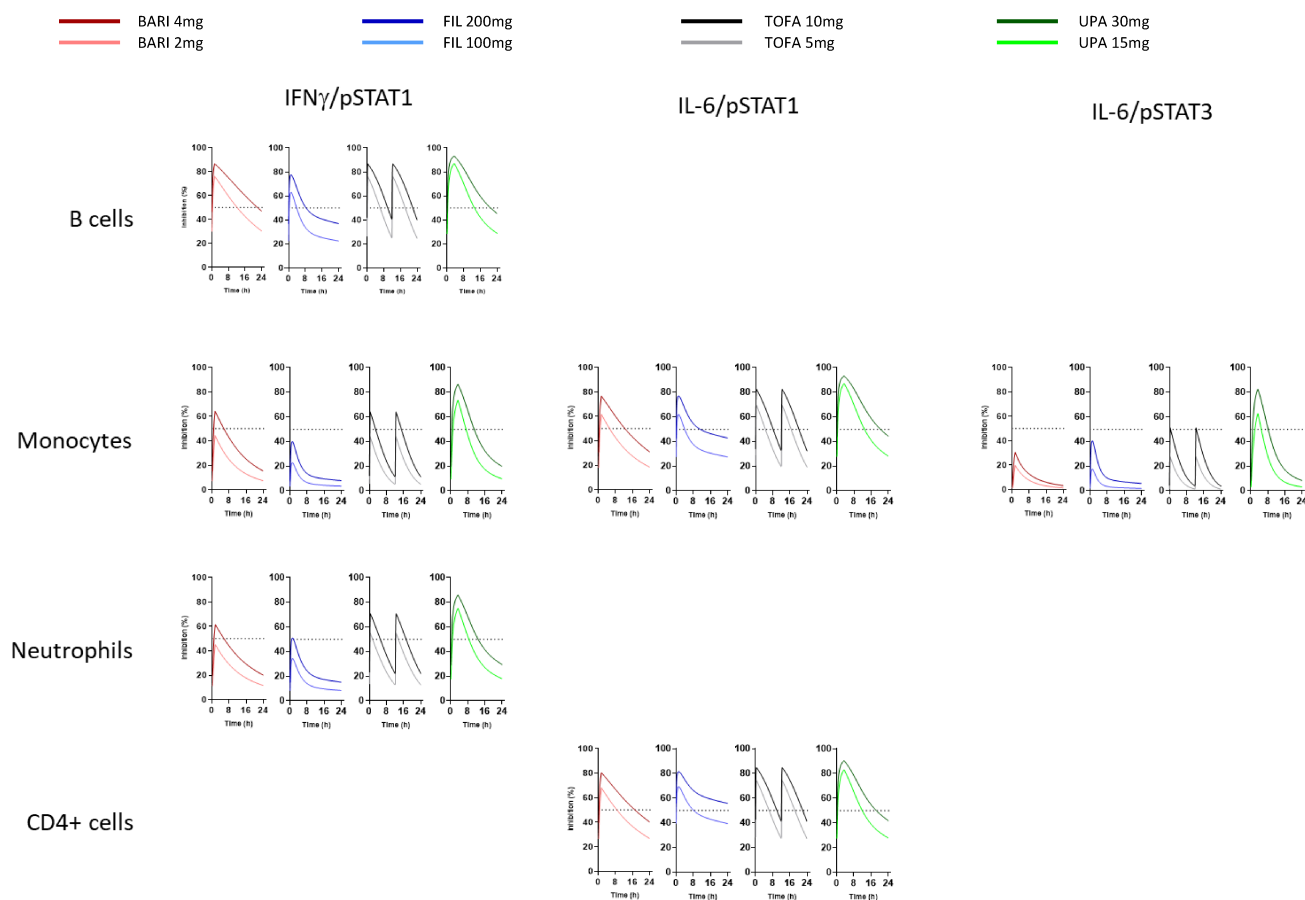

Inhibition curves of IFN $\gamma$  and IL-6-induced STAT phosphorylation by JAKinibs (24-hour dose intervals) at clinical doses (calculated based on in vitro WB measurements from healthy volunteers). N=7–10 donors.

BARI, baricitinib; FIL, filgotinib; IL, interleukin; INF, interferon; JAKinib; Janus kinase inhibitor; NK, natural killer; pSTAT, phosphorylated signal transducer and activator of transcription; TOFA, tofacitinib; UPA, upadacitinib; WB, whole blood.
